## Retraction

**Retraction of: miR-34a inhibits melanoma growth by targeting ZEB1**Yazhen Xu<sup>1</sup>, Bingyu Guo<sup>1</sup>, Xiaoyan Liu<sup>1</sup>, Kai Tao<sup>1</sup><sup>1</sup>Reconstructive and Plastic Surgery, General Hospital of Northern Theater Command, Shenyang, P.R. ChinaCorrespondence to: Kai Tao; email: [luzongzhengxing@sina.com](mailto:luzongzhengxing@sina.com), <https://orcid.org/0000-0002-0919-357X>

Keywords: miR-34a, melanoma, ZEB1, proliferation, migration

Original article: *Aging (Albany NY)* 2021; 13: pp 15538–15547PMID: [34102608](https://pubmed.ncbi.nlm.nih.gov/34102608/)PMCID: [PMC8221330](https://pubmed.ncbi.nlm.nih.gov/PMC8221330/)doi: [10.18632/aging.203114](https://doi.org/10.18632/aging.203114)

**This article has been retracted:** Aging has completed its investigation of this paper. We found multiple instances of overlap between transwell assay images in this article and images from previously published unrelated papers. Specifically, the transwell assay images in Figure 2G, representing cell migration data, overlap images from unrelated papers [1-4] and the image in Figure 2H overlaps an image from retracted paper [5]. Also, the transwell assay images in Figures 2H and 2I overlap images from earlier published papers [6, 7]. In addition, the ZEB1 western blot panel in Figure 3E is a duplication of the GAPDH panel in [8]. The Scientific Integrity office at Aging contacted the authors and they admitted “improper data storage” and “repeated use of images in the article.” Consequently, all authors agreed that the article should be retracted.

## REFERENCES

1. Jiashi W, Chuang Q, Zhenjun Z, Guangbin W, Bin L, Ming H. MicroRNA-506-3p inhibits osteosarcoma cell proliferation and metastasis by suppressing RAB3D expression. *Aging (Albany NY)*. 2018; 10:1294–305. <https://doi.org/10.18632/aging.101468>  
PMID:[29905536](https://pubmed.ncbi.nlm.nih.gov/29905536/)
2. Wang H, Guo B, Lin S, Chang P, Tao K. Apigenin inhibits growth and migration of fibroblasts by suppressing FAK signaling. *Aging (Albany NY)*. 2019; 11:3668–78. <https://doi.org/10.18632/aging.102006>  
PMID:[31170089](https://pubmed.ncbi.nlm.nih.gov/31170089/)
3. Zhao Z, Gao D, Ma T, Zhang L. MicroRNA-141 suppresses growth and metastatic potential of head and neck squamous cell carcinoma. *Aging (Albany NY)*. 2019; 11:921–32. <https://doi.org/10.18632/aging.101791>  
PMID:[30737360](https://pubmed.ncbi.nlm.nih.gov/30737360/)
4. Chen J, Yan C, Yu H, Zhen S, Yuan Q. miR-548d-3p inhibits osteosarcoma by downregulating KRAS. *Aging (Albany NY)*. 2019; 11:5058–69. <https://doi.org/10.18632/aging.102097>  
PMID:[31327761](https://pubmed.ncbi.nlm.nih.gov/31327761/)
5. Wang W, Zhang L, Gao W, Zhang D, Zhao Z, Bao Y. miR-489 promotes apoptosis and inhibits invasiveness of glioma cells by targeting PAK5/RAF1 signaling pathways. *Oncol Rep*. 2019; 42:2390–401. <https://doi.org/10.3892/or.2019.7381>  
PMID:[31638257](https://pubmed.ncbi.nlm.nih.gov/31638257/)  
Retraction in: *Oncol Rep*. 2023; 49:127. <https://doi.org/10.3892/or.2023.8564>  
PMID:[37165914](https://pubmed.ncbi.nlm.nih.gov/37165914/)
6. Tian F, Ding D, Li D. Fangchinoline targets PI3K and suppresses PI3K/AKT signaling pathway in SGC7901 cells. *Int J Oncol*. 2015; 46:2355–63. <https://doi.org/10.3892/ijo.2015.2959>  
PMID:[25872479](https://pubmed.ncbi.nlm.nih.gov/25872479/)

Retraction in: Int J Oncol. 2023; 63:99. <https://doi.org/10.3892/ijo.2023.5547>  
PMID:[37477139](https://pubmed.ncbi.nlm.nih.gov/37477139/)

7. Kong W, Liu X, Yin G, Zheng S, Zhu A, Yu P, Shan Y, Ying R, Zhang J. Extracellular vesicle derived miR-544 downregulates expression of tumor suppressor promyelocytic leukemia zinc finger resulting in increased peritoneal metastasis in gastric cancer. Aging (Albany NY). 2020; 12:24009–22.  
<https://doi.org/10.18632/aging.104082>  
PMID:[33221764](https://pubmed.ncbi.nlm.nih.gov/33221764/)
8. Pei Y, Zhang Y, Zheng K, Shang G, Wang Y, Wang W, Qiu E, Li S, Liu F, Zhang X. *Ilex hainanensis* Merr targets ITGAV to suppress the proliferation and metastasis of osteosarcoma cells. Onco Targets Ther. 2019; 12:4499–507.  
<https://doi.org/10.2147/OTT.S205688>  
PMID:[31239718](https://pubmed.ncbi.nlm.nih.gov/31239718/)
